# Supplementary material for: SNP-SNP Interactions Discovered by Logic Regression Explain Crohn's Disease Genetics
Source: PubMed Central journal article supplement (PMC3470545; doi:10.1371/journal.pone.0043035), 2012-10-12

**Cases**

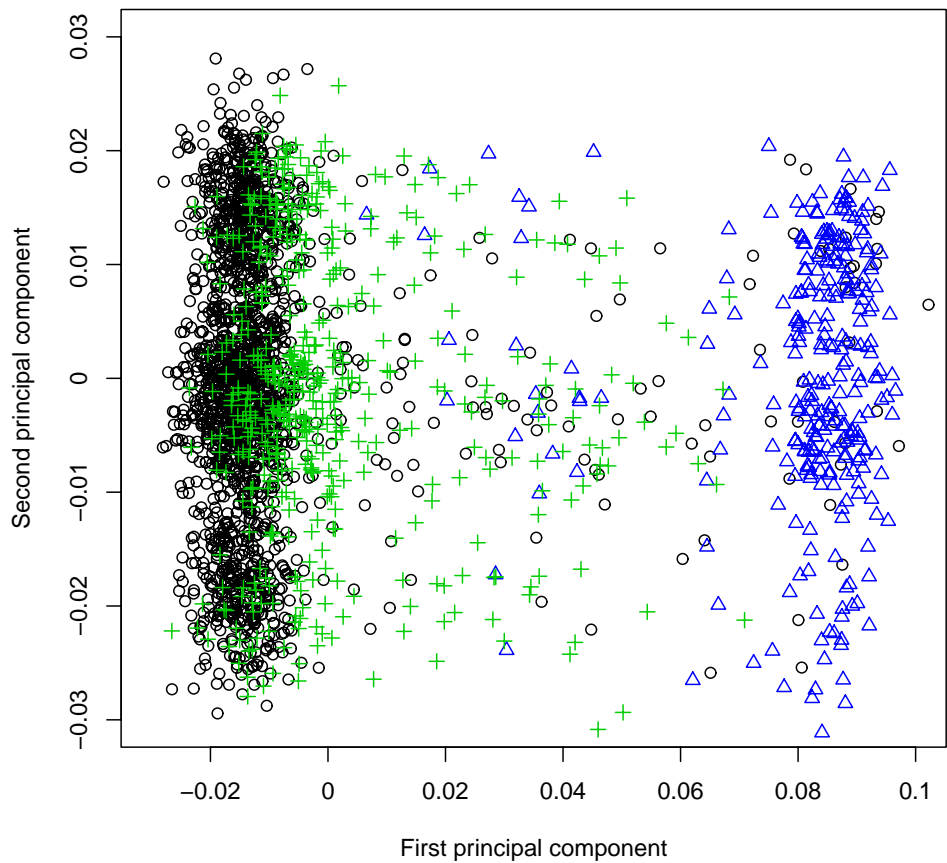

**Controls**

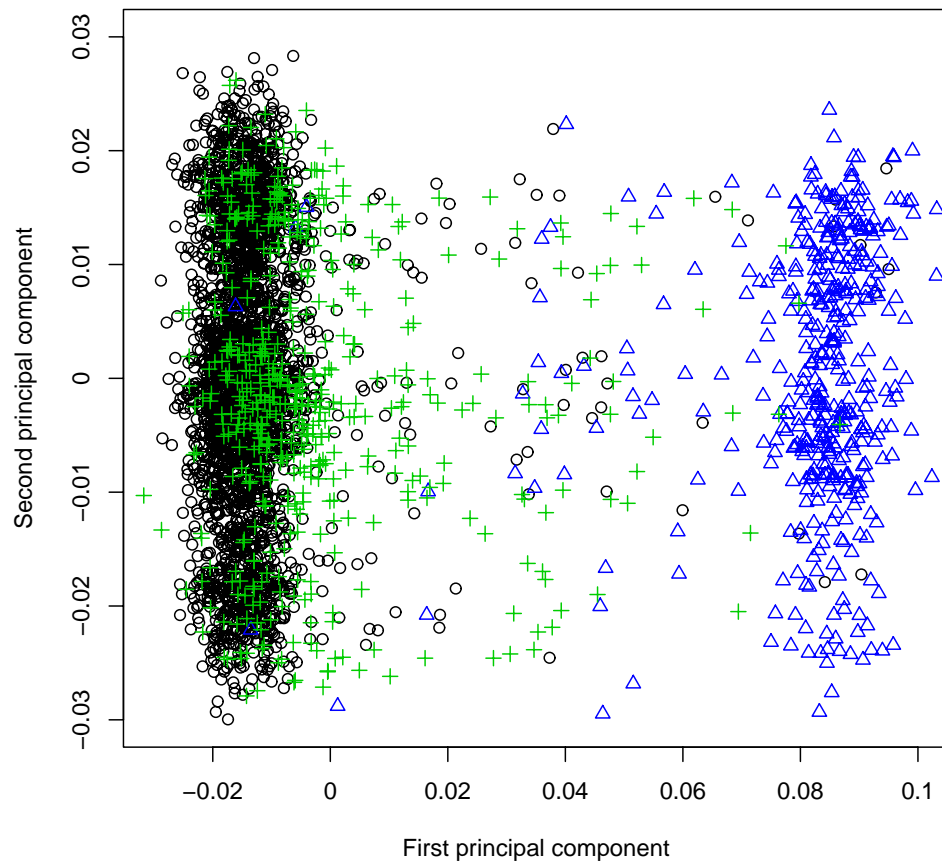

Supplement: pone.0043035.s002.pdf [file pone.0043035.s002.pdf]
